# Supplementary material for: Non-Born–Oppenheimer wavepacket dynamics in polyatomic molecules: vibrations at conical intersections in DABCO
Source: Royal Society of Chemistry journal article supplement (doi:10.1039/c0fd00033g), 2011-01-01
Supplement: c0fd00033g.pdf [file c0fd00033g.pdf]

# 1 Supplementary Materials

Table S1: Harmonic Frequencies at Ground and Excited State Minima. Frequencies in  $\text{cm}^{-1}$  and quasi- $D_{3h}$  symmetry labels are employed, although the actual symmetry of  $S_0$ ,  $S_1$ , and the Jahn-Teller distorted  $S_2$  minima are  $D_3$ ,  $C_3$ , and  $C_{2v}$ , respectively. The splitting of non-degenerate components for  $S_2$  state minimum are shown in final column.

| Mode               | $R_{min}[S_0]$ | $R_{min}[S_1]$ | $R_{min}[S_{2x}]$ |      |
|--------------------|----------------|----------------|-------------------|------|
| $\omega_1(a_1)$    | 3218           | 3239           | 3203              |      |
| $\omega_2(a_1)$    | 1615           | 1639           | 1643              |      |
| $\omega_3(a_1)$    | 1474           | 1386           | 1409              |      |
| $\omega_4(a_1)$    | 1059           | 1017           | 970               |      |
| $\omega_5(a_1)$    | 873            | 864            | 854               |      |
| $\omega_6(a_1)$    | 634            | 767            | 731               |      |
| $\omega_7(a_2)$    | 3270           | 3313           | 3283              |      |
| $\omega_8(a_2)$    | 1258           | 1251           | 1255              |      |
| $\omega_9(a_2)$    | 858            | 871            | 871               |      |
| $\omega_{10}(a_1)$ | 3249           | 3297           | 3269              |      |
| $\omega_{11}(a_1)$ | 1337           | 1279           | 1267              |      |
| $\omega_{12}(a_1)$ | 1077           | 1072           | 1080              |      |
| $\omega_{13}(a_1)$ | 112            | 84             | 70                |      |
| $\omega_{14}(a_2)$ | 3199           | 3222           | 3199              |      |
| $\omega_{15}(a_2)$ | 1595           | 1612           | 1708              |      |
| $\omega_{16}(a_2)$ | 1476           | 1454           | 1552              |      |
| $\omega_{17}(a_2)$ | 1054           | 908            | 1316              |      |
| $\omega_{18}(a_2)$ | 829            | 555            | 911               |      |
| $\omega_{19}(e')$  | 3279           | 3307           | 3296<br>3287      | 9    |
| $\omega_{20}(e')$  | 3208           | 3224           | 3199<br>3189      | 10   |
| $\omega_{21}(e')$  | 1598           | 1601           | 1601<br>1491      | 110  |
| $\omega_{22}(e')$  | 1452           | 1462           | 1467<br>160       | 1307 |
| $\omega_{23}(e')$  | 1418           | 1338           | 1363<br>1322      | 41   |
| $\omega_{24}(e')$  | 1191           | 1116           | 1126<br>1105      | 21   |
| $\omega_{25}(e')$  | 973            | 910            | 941<br>921        | 20   |
| $\omega_{26}(e')$  | 883            | 843            | 778<br>771        | 7    |
| $\omega_{27}(e')$  | 448            | 473            | 653<br>479        | 174  |
| $\omega_{28}(e'')$ | 3252           | 3296           | 3278<br>3275      | 3    |
| $\omega_{29}(e'')$ | 3195           | 3219           | 3189<br>3189      | 0    |
| $\omega_{30}(e'')$ | 1582           | 1585           | 1584<br>1582      | 2    |
| $\omega_{31}(e'')$ | 1437           | 1447           | 1465<br>1464      | 1    |
| $\omega_{32}(e'')$ | 1388           | 1374           | 1382<br>1382      | 0    |
| $\omega_{33}(e'')$ | 1287           | 1245           | 1237<br>1236      | 1    |
| $\omega_{34}(e'')$ | 1123           | 1139           | 1152<br>1149      | 3    |
| $\omega_{35}(e'')$ | 620            | 2 577          | 585<br>585        | 0    |
| $\omega_{36}(e'')$ | 339            | 358            | 380<br>379        | 1    |

Table S2: Minimum Energy Cartesian Geometry of  $X^1A'_1$  State

|   |             |             |             |
|---|-------------|-------------|-------------|
| N | 1.27919980  | 0.00101494  | 0.00001575  |
| N | -1.27919980 | -0.00101494 | 0.00001575  |
| C | 0.77587276  | 0.05426160  | 1.37052511  |
| C | -0.77587276 | -0.05426160 | 1.37052511  |
| C | 0.77500100  | 1.16070239  | -0.73167683 |
| C | -0.77500100 | -1.16070239 | -0.73167683 |
| C | 0.77688035  | -1.21308940 | -0.63880350 |
| C | -0.77688035 | 1.21308940  | -0.63880350 |
| H | 1.10565679  | 0.99445028  | 1.81427108  |
| H | -1.10565679 | -0.99445028 | 1.81427108  |
| H | 1.10562565  | 1.07533973  | -1.76754690 |
| H | -1.10562565 | -1.07533973 | -1.76754690 |
| H | 1.10811759  | -2.06710030 | -0.04671220 |
| H | -1.10811759 | 2.06710030  | -0.04671220 |
| H | 1.23175486  | -0.75563208 | 1.94138849  |
| H | -1.23175486 | 0.75563208  | 1.94138849  |
| H | 1.22950611  | 2.06056062  | -0.31536245 |
| H | -1.22950611 | -2.06056062 | -0.31536245 |
| H | 1.23217238  | -1.30193567 | -1.62594762 |
| H | -1.23217238 | 1.30193567  | -1.62594762 |

Table S3: Minimum Energy Cartesian Geometry of  $A^1A'_1$  State

|   |             |             |             |
|---|-------------|-------------|-------------|
| N | 0.00286784  | 1.25000571  | 0.00041973  |
| N | 0.00468498  | -1.20319066 | -0.00074895 |
| C | 1.36553627  | 0.78992782  | -0.05025603 |
| C | 1.38385439  | -0.81592717 | 0.05091969  |
| C | -0.63426444 | 0.78783763  | 1.20523597  |
| C | -0.72164122 | 0.78890007  | -1.15439434 |
| C | -0.72991362 | -0.81802892 | 1.16833678  |
| C | -0.64074746 | -0.81682165 | -1.22094957 |
| H | 1.93523052  | 1.19787238  | 0.77929055  |
| H | 1.82549945  | 1.09596475  | -0.98488806 |
| H | 1.82363446  | -1.14399428 | 0.98666002  |
| H | 1.92648307  | -1.24679209 | -0.78398099 |
| H | -1.63780437 | 1.19497677  | 1.28437270  |
| H | -1.76149767 | 1.09336879  | -1.08540921 |
| H | -0.05505102 | 1.09311156  | 2.07130875  |
| H | -0.28868367 | 1.19756715  | -2.06250093 |
| H | -1.75994932 | -1.14669908 | 1.08088583  |
| H | -1.63445136 | -1.24919353 | -1.27345497 |
| H | -0.27788019 | -1.24978522 | 2.05512932  |
| H | -0.04977264 | -1.14394511 | -2.06970403 |

Table S4: Minimum Energy Cartesian Geometry of  $B^1A_1$  State

|   |             |             |             |
|---|-------------|-------------|-------------|
| N | 0.00280783  | 1.20923810  | 0.00000000  |
| N | 0.00189554  | -1.23840208 | 0.00000000  |
| C | 1.36913484  | 0.79636144  | 0.00000000  |
| C | 1.36852905  | -0.82653706 | 0.00000000  |
| C | -0.68340299 | 0.79704399  | 1.18268417  |
| C | -0.68340299 | 0.79704399  | -1.18268417 |
| C | -0.68400334 | -0.82568591 | 1.18268528  |
| C | -0.68400334 | -0.82568591 | -1.18268528 |
| H | 1.88047221  | 1.15530396  | 0.88751077  |
| H | 1.88047221  | 1.15530396  | -0.88751077 |
| H | 1.87957299  | -1.18589922 | 0.88750595  |
| H | 1.87957299  | -1.18589922 | -0.88750595 |
| H | -1.70913204 | 1.15186790  | 1.17479626  |
| H | -1.70913204 | 1.15186790  | -1.17479626 |
| H | -0.16569776 | 1.15716141  | 2.06666054  |
| H | -0.16569776 | 1.15716141  | -2.06666054 |
| H | -1.70998351 | -1.17978385 | 1.17477945  |
| H | -1.70998351 | -1.17978385 | -1.17477945 |
| H | -0.16654333 | -1.18622763 | 2.06663756  |
| H | -0.16654333 | -1.18622763 | -2.06663756 |

Table S5: Minimum Energy Cartesian Geometry of  $D^1A_2'$  State

|   |             |             |             |
|---|-------------|-------------|-------------|
| N | 0.00286851  | 2.28138326  | 0.00000000  |
| N | 0.00102603  | -2.33687317 | 0.00000000  |
| C | 2.58526738  | 1.50554054  | 0.00000000  |
| C | 2.58404444  | -1.56308040 | 0.00000000  |
| C | -1.28879483 | 1.50708576  | 2.23669100  |
| C | -1.28879483 | 1.50708576  | -2.23669100 |
| C | -1.29001955 | -1.56153524 | 2.23669190  |
| C | -1.29001955 | -1.56153524 | -2.23669190 |
| H | 3.54051384  | 2.20027018  | 1.67794218  |
| H | 3.54051384  | 2.20027018  | -1.67794218 |
| H | 3.53873180  | -2.25857912 | 1.67793971  |
| H | 3.53873180  | -2.25857912 | -1.67793971 |
| H | -3.21914123 | 2.20296851  | 2.22474613  |
| H | -3.21914123 | 2.20296851  | -2.22474613 |
| H | -0.31286522 | 2.20180991  | 3.90268795  |
| H | -0.31286522 | 2.20180991  | -3.90268795 |
| H | -3.22092047 | -2.25588000 | 2.22474348  |
| H | -3.22092047 | -2.25588000 | -2.22474348 |
| H | -0.31464125 | -2.25704049 | 3.90268746  |
| H | -0.31464125 | -2.25704049 | -3.90268746 |

Table S6: Minimum Energy Jahn-Teller point on  $B^1E''$  State

|   |             |             |             |
|---|-------------|-------------|-------------|
| N | 0.00147488  | 1.20922502  | 0.00000000  |
| N | 0.00054162  | -1.23843121 | 0.00000000  |
| C | 1.36830289  | 0.79631855  | 0.00000000  |
| C | 1.36769372  | -0.82648516 | 0.00000000  |
| C | -0.68217527 | 0.79710019  | 1.18384401  |
| C | -0.68217527 | 0.79710019  | -1.18384401 |
| C | -0.68279871 | -0.82570309 | 1.18385234  |
| C | -0.68279871 | -0.82570309 | -1.18385234 |
| H | 1.87659893  | 1.15393380  | 0.89001287  |
| H | 1.87659893  | 1.15393380  | -0.89001287 |
| H | 1.87554433  | -1.18469966 | 0.89002761  |
| H | 1.87554433  | -1.18469966 | -0.89002761 |
| H | -1.70689218 | 1.15530045  | 1.17891660  |
| H | -1.70689218 | 1.15530045  | -1.17891660 |
| H | -0.16534528 | 1.15471271  | 2.06892962  |
| H | -0.16534528 | 1.15471271  | -2.06892962 |
| H | -1.70771505 | -1.18333374 | 1.17876829  |
| H | -1.70771505 | -1.18333374 | -1.17876829 |
| H | -0.16614248 | -1.18392145 | 2.06879584  |
| H | -0.16614248 | -1.18392145 | -2.06879584 |

Table S7: Minimum Energy Conical Intersection  $A^1A_1B^1A_1$  States

|   |             |             |             |
|---|-------------|-------------|-------------|
| N | 0.01757475  | 1.07095920  | 0.00000000  |
| N | 0.01770018  | -1.09563176 | 0.00000000  |
| C | 1.31718418  | 0.83631810  | 0.00000000  |
| C | 1.31756746  | -0.86022118 | 0.00000000  |
| C | -0.68340801 | 0.83630271  | 1.13468792  |
| C | -0.68340801 | 0.83630271  | -1.13468792 |
| C | -0.68331139 | -0.86114073 | 1.13459827  |
| C | -0.68331139 | -0.86114073 | -1.13459827 |
| H | 1.88092527  | 1.04925588  | 0.93875081  |
| H | 1.88092527  | 1.04925588  | -0.93875081 |
| H | 1.88154828  | -1.07288735 | 0.93870308  |
| H | 1.88154828  | -1.07288735 | -0.93870308 |
| H | -1.78033490 | 1.02943059  | 1.09805894  |
| H | -1.78033490 | 1.02943059  | -1.09805894 |
| H | -0.06942159 | 1.05579975  | 2.03713439  |
| H | -0.06942159 | 1.05579975  | -2.03713439 |
| H | -1.78021272 | -1.05443416 | 1.09797255  |
| H | -1.78021272 | -1.05443416 | -1.09797255 |
| H | -0.06951914 | -1.08069477 | 2.03717107  |
| H | -0.06951914 | -1.08069477 | -2.03717107 |

Table S8: Minimum Energy Conical Intersection  $A^1A_1C^1B_2$  States

|   |             |             |             |
|---|-------------|-------------|-------------|
| N | -0.00769885 | 1.06548128  | 0.00000000  |
| N | -0.00822547 | -1.09468705 | 0.00000000  |
| C | 1.32596016  | 0.84587925  | 0.00000000  |
| C | 1.32523551  | -0.87635494 | 0.00000000  |
| C | -0.63361571 | 0.83759130  | 1.15108805  |
| C | -0.63361571 | 0.83759130  | -1.15108805 |
| C | -0.63416472 | -0.86615104 | 1.15117833  |
| C | -0.63416472 | -0.86615104 | -1.15117833 |
| H | 1.80330146  | 1.02958512  | 0.98845906  |
| H | 1.80330146  | 1.02958512  | -0.98845906 |
| H | 1.80241431  | -1.06050682 | 0.98846190  |
| H | 1.80241431  | -1.06050682 | -0.98846190 |
| H | -1.72556304 | 1.07107253  | 1.12169760  |
| H | -1.72556304 | 1.07107253  | -1.12169760 |
| H | -0.09535059 | 1.03035591  | 2.10773497  |
| H | -0.09535059 | 1.03035591  | -2.10773497 |
| H | -1.72625598 | -1.09897525 | 1.12174340  |
| H | -1.72625598 | -1.09897525 | -1.12174340 |
| H | -0.09609603 | -1.05917594 | 2.10786117  |
| H | -0.09609603 | -1.05917594 | -2.10786117 |
